# Supplementary material for: Flavonoid Synthesis by Deinococcus sp. 43 Isolated from the Ginkgo Rhizosphere
Source: MDPI journal article supplement (doi:10.3390/microorganisms11071848), 2023-07-21
Supplement: s1 [file s1]

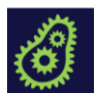

1. The numbers at the nodes indicate the levels of bootstrap support based on Kimura distance and the neighbour-joining method.

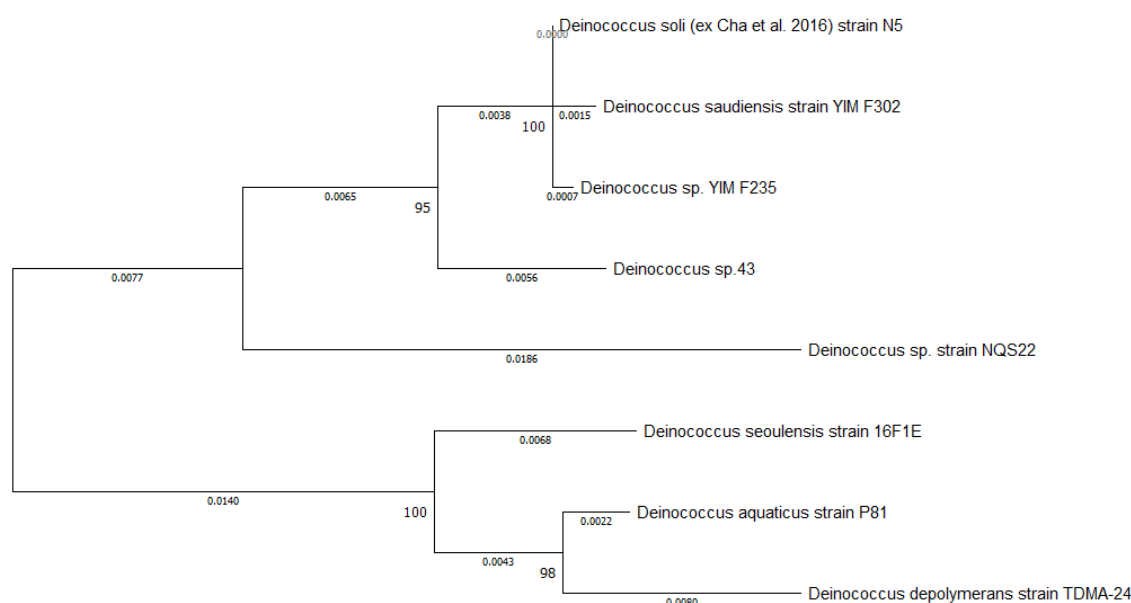

**Figure S1.** The numbers at the nodes indicate the levels of bootstrap support based on Kimura distance and the neighbor-joining method.

2. Homologous evolutionary relationship of key genes in the upstream flavonoid synthesis pathway. Evolutionary analysis was performed using MEGA X. Clustal W was used to compare each protein sequence. Based on the Poisson model, the phylogenetic tree was constructed by NJ (Neighbor-joining) method and evaluated with bootstrap value 5000. In order to further confirm the Protein homology, the similarity search of Hidden Markov model (HMM) (E value  $<1e-5$ ) was used to identify the characteristic Protein family (Pfam) domains contained in the two closest phylogenetic protein sequences. Relevant protein sequences were submitted to InterProScan 5 for conserved domain search.

(1).CHI:

> KALODDLK\_00111 tRNA 5-methylaminomethyl-2-thiouridine biosynthesis bi-functional protein MnmC

MIGAGIAGASVAYFLGRAGAQVTVDAGAHRASDVPSALINPVRGQSGGV DAR-  
ALDGM RFT-  
WTLLRDLKAAGHAVPHAQLGVL RPIPD DRARARFERNLPAALNHAWLSSAD APEPL  
APGWGHV LHL PDGGWVDGPAFTRALVQASGAQVVTGRAQDW-  
TARTVTLAGGDTLSGDAV-  
VFCGGSVGV TW RGEAATHRRG TLLTLDRAVTRVPLSFGAYLAPDARGGV LGATFETPS  
PTWTPDGLPLASLGWLLGKGAALTDLRGARVTGHW TGT RL SGLNAG-  
PQGGGTWWLTGLSSKGFL LGPLLAELASELMSAARPG

> WP\_029242752.1 FAD-dependent oxidoreductase [*Pseudomonas viridiflava*]

MSTLFETDALIIGGGIVGASAALALALKGKRVALLERDFCGSHSSGVNY-  
GGVRRQGRPLSQLPLSQRAHHIWGNLRDLIGIDGEYQRSGLKLARS DQDMYALRAY  
AQASQGFG LDLQLLDRAELR ARF-  
PWAGDVAVGASLCADDGHANPRLVSPAFARAAR-  
LAGAQVFEQAQVTQVNHDGQAFIVETANGLKLRAPWLLNCAGAWAGQLAAQFNE  
PVP MYSGHPAMLVTEPLPMFMDVSTGVEGGGIYARQVARGNCV LGGGQGFALD-  
PAR-  
TRPGQAAVLDILRNAVELYPPLKGAQAIR TWSGTEGYLPDREPVLGPSLAQPGL LHGF

GFAGAGFQIGPAAGEALAEWVCAGHSSISLDAFSIGRFRTEQALSITDSTLIVSPRSA-  
PEPVSNVIPLHRGRSPL

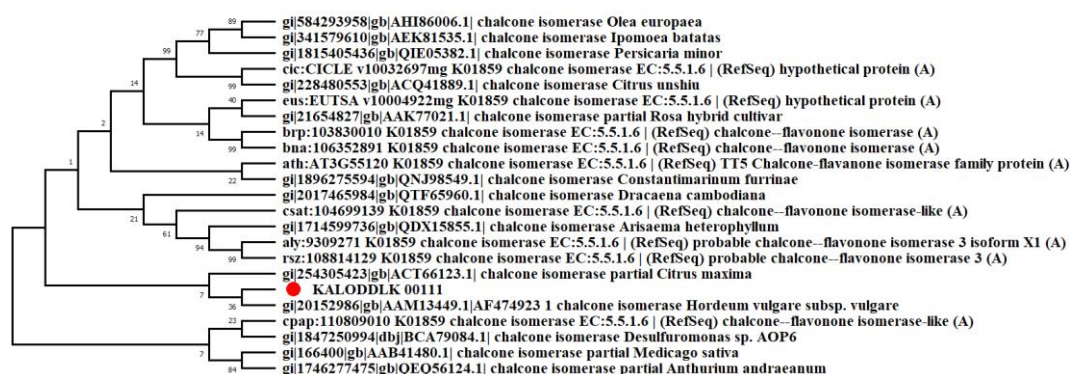

```

549
gi|1847250994|dbj|BCA79084.1|  MIGAGIAGASVAYFLGRAGAQTVDAGAHRASDVPSALINPVRQSGGVDRALDGMRF 60
MIV-----RLLL-----SLLLLAPLPVL-----AVEVEGVQL 27
**          :*          *: *:          *: *: *:

549
gi|1847250994|dbj|BCA79084.1|  TWTLRLDLKAAGHAVPHAQLGVLRLPDPDRARARFERNLPAALNHAWLSSADAPEPL--- 117
---PDRLEVQGETLHHNGHGIRKLF-----FD-----IYIGSLYTATPVRS 67
*.: *: *: *: *: *: *: *: *: *: *: *: *:

549
gi|1847250994|dbj|BCA79084.1|  ----APGWGHVHLHPDGGW---VDG---PAFTRALVQASGAQVVTG---RAQDWTART 162
SETLASPGAKLI---LMDFLYKKVEKEKIEAFREGLANQSAA---LASGEAKAFLWF--- 121
:* : *: *: *: *: *: *: *: *: *: *: *:

549
gi|1847250994|dbj|BCA79084.1|  VTLAGGDTLSGDVVFVCGGSGVGTWRGEAATHRRGTLLTLDRAVTRVPLSFGAYLAPDAR 222
---GRDFVRGDRVELELGGDG-----TVTARHNGELLGTLHSTAFEAELGIYLGDK-- 170
* *: *: *: *: *: *: *: *: *: *: *: *:

549
gi|1847250994|dbj|BCA79084.1|  GGVLGATFETPSPTWTPDGLPLASLGWLLGKGAALTDLRGARVTGHWTRLSGLNAGPQ 282
-----PADARLKAGMLQKQKER----- 186
* : *: *: *: *:

549
gi|1847250994|dbj|BCA79084.1|  GGGTWWLTGLSSKGFLGPLLAELASELSAARPG 318
----- 186

```

## (2).CHS:

>KALODDLK\_00431 1,3,6,8-tetrahydroxynaphthalene synthase

MRRMPLTPHLRALVTGTPPHLTPQTQVQEAARTLFPMAARPQLLDVFT-  
NAMIDTRALARPLEWYLTPRGFGEKNAVFVQEARALTRRLAQEALAAQITPADVD  
AVVVVNTSGISAPSLDADLIEHLGINRHAARLPVWGLGCAGGASGLARAADLVRA-  
GYR-  
RVLYVAVELCSLTLVHGDETKSNFVGTALFSDGGAAAVLTHPDEPGPAPLAELCGAYST  
LIEDSEDIMGWDVDEGLKVRFSRDIPTLVRG-  
MMQGNVQAALSAHGWCPQTQIGTYVHPGGVKVLSAYEEALNLPAGALDASRHVLR  
HYGNMSSVTVFLVLEETLRAHPQGRALLSAMGPGFSAEHVLLNFP

>CNM35526.1 chalcone synthase [Mycobacterium tuberculosis]

PPHLTPQTQVQEAARTLFPMAARPQLLDVFTNAMIDTRALARPLEWYL-  
PRGFGEKNAVFVQEARALTRRLAGEALDAAQITPANVDVVVNTSGISAPSLDADLI  
EHLGINRHAARLPVWGLGCAGGASGLARAADLVRAGYRRVLYVAVELCSL-  
LVHGDETK-  
SNFVGTALFSDGGAAAVLTHPDEPGPAPLAELCGAYSTLIENSEDIMGWDVDEGLKV  
RFSRDIPTLVRGMMQGNVQAALSAHGWCPQTQVGTYYVHPGGVKVLSAYEEAL-  
NLPAGAL-  
DASRHVLRHYGNMSSVTVFLVLEETLRAHPQGRALLTAMGPGFSAEHVLLNFP

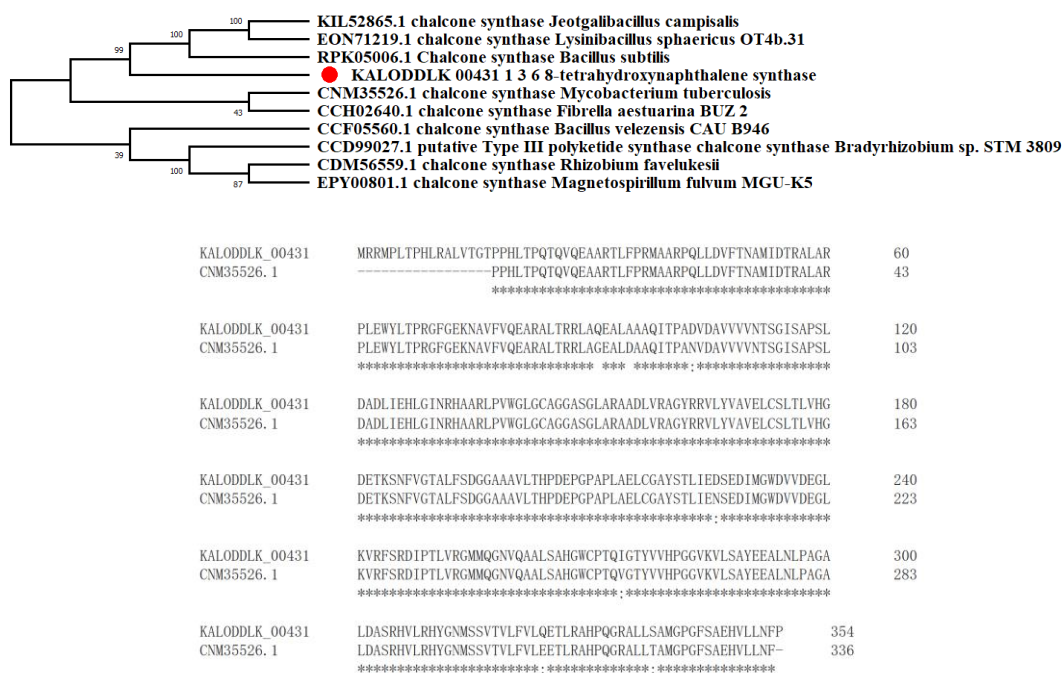

(3).F3H:

>KALODDLK\_02511 Catechol-2,3-dioxygenase

MTTDSVLPASTHVGAHVLNVRDLNGTAAFYATLLGLSATTLTETDVTLAAHGT-  
PLLHL-

HAAPDLPRAPVSRPGLYHTAFLLPTRAALGRWLAAHARLGHRIKSGDHLVSEAFYLN  
DPEGNGIEVYADRPRDWTWRDQVQMDTKAVDAAAVLASAGIDPATLDGTAP-  
FTAPQGTTVGHVHLKVGSAQAARWYADTLGLDVVADLGSAAFWSGGYHHHVG  
LNEWHSAGQPAPSTPAAGLAGVTFHAPDLGALRAHLAGRADVQNEGHLTLRD-  
PWGNRVTVAQ

>svs:117847667 K00475 naringenin 3-dioxygenase [EC:1.14.11.9] | (RefSeq) flavanone  
3-dioxygenase 1 isoform X1 (A)

MLLYKAAAQAAYGVRYEQQPSAFRSTIIDREAAARTTTTMAPASSAAPFLPT-  
TASSEAT-  
LPPSFVREEDERPKVPHDSFSDEVPIVSLDGIGGGERRAEIRARVAAACEDWGIFQVVD  
HGVDAAALVAEMARLARDFFALPPQEKLRFDMSGGKKG-  
FIVSSHLQGEAVQDWREIVTY-  
FSYPVKARDYSRWPDKPAAWRAVVEQYSEQLVGLSCKLLGVLSEAMGLEAGALAEA  
CVEMDQKVNVNFYPRCQPPDLTLGLKRHTDPGTITLLQLDLVG-  
GLQATRDGGRTWITVQPVGEAFVNLGDHGHFLSNGRFGKNADHQAVVNSECSRLSI  
ATFQNPAPDATVYPLAVREGEAPILDEPITFAEMYRRKMARDIE-  
VAKLKKQARAAAEKQQVQVQMPQQSASEEFAVPKPESLDEILA

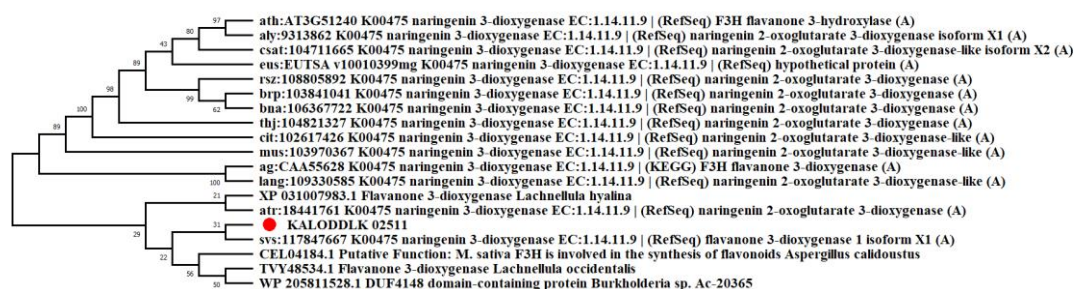

|                                 |                                                                                                                                                                                    |            |
|---------------------------------|------------------------------------------------------------------------------------------------------------------------------------------------------------------------------------|------------|
| KALODDLK_02511<br>svs:117847667 | MTTDSVLPASTHVGAVHLNVRDLNGTAFFYATLLGLSATTITETDVTLAHGTPLHLHA<br>-----MLLY---KAAAQAAYGVRYEQQPSAFRSTIIDREAAARTTTTMAPASSAAPFLPTTA<br>:* . . . . .** : :** :*: . ,*: : * : : * : :*: * * | 60<br>54   |
| KALODDLK_02511<br>svs:117847667 | -----APDLPRAPVSRPGLYHTA-----<br>SSEATLPPSFVREEDERPKVPHDSFSDSEVPVISLDGIGGGERRAEIRARVAAACEDWGIF<br>* : * : * : * : *                                                                 | 78<br>114  |
| KALODDLK_02511<br>svs:117847667 | -----FLLPTRAALG-----RWLAHAARLGHRIKSGDHL<br>QVVDHGVDAALVAEMARLARDFFALPPQEKLRFDMSGGKGGFIVSSHLQGEAVQDWREI<br>* * * : * : : : * : . : . : *                                            | 107<br>174 |
| KALODDLK_02511<br>svs:117847667 | VSEAFYLNDEPGNGIEVYADRPDRTWTWRDQVQMDTKAVDAAAVLA-----SAGIDPAT<br>V---TYFSYPV---KARDYSRWPDKPAWRAVVEQYSEQLVGLSCKLLGVLSEAMGLEAGA<br>* * : , * . * : * : : ** * : : * : . : * : * : : *  | 162<br>229 |
| KALODDLK_02511<br>svs:117847667 | LDGTAPFTAPQGTTVGHVHLKVGSAQAARWYAD-----TLGLDVADLGSAAFL-----<br>LAEC-----VEMDQ---KVVVNFYPRCQPDLTGLKRHTDPGTITLLQL<br>* : . : : : . : : : * * * * : * : : * *                          | 212<br>274 |
| KALODDLK_02511<br>svs:117847667 | -----SWGYYHHVGLNEWHSAGQPA---PSTPAAGLAGVT<br>VGGLQATRDGGRTWITVQPEGAFFVNLGDHGHFLSNGRFKNADHQAVNSECSRLSIAT<br>* : * : * : . : : : * : * : : * : * : *                                  | 245<br>334 |
| KALODDLK_02511<br>svs:117847667 | FHAPDLGALRAHLAGADVQNEGHLTLRDPWGNRVTAQ<br>FQNPAPDATVYPLA-----VREGAPILDEP-----<br>* : * : * * : * * : * *                                                                            | 285<br>360 |

## (4).4CL:

&gt;KALODDLK\_02763 30S ribosomal protein S12

VCTRVYTTTPKKPNSALRKVCRVRLTNGFEVTSYIGGEGHNLQEHSVILIRG-  
GRVKDLPGVRYHTVRGALDCSGVKDRKQARSKYGVKRPKA>BAE77949.1 30S ribosomal subunit protein S12 [Escherichia coli str. K-12 substr.  
W3110]MCTVVKTTTTPKKPNSALRKIARVRLSSAFEVTAYIPGEGHNLQEHSVVLIRG-  
GRVKDLPGVRYHIVRGSLDTQGVKDRNKSRSKYGTKKPKA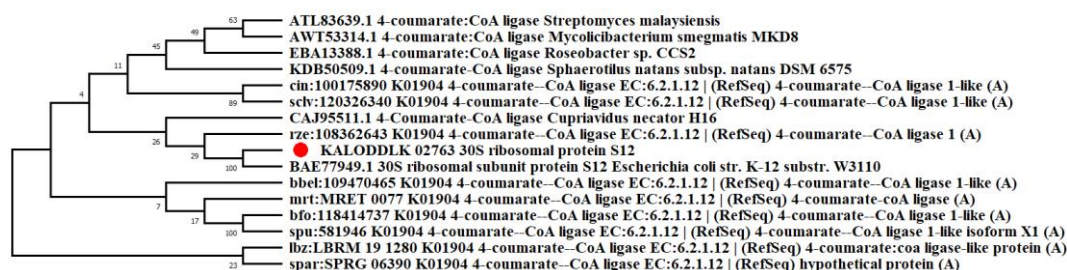

|                |                                                              |    |
|----------------|--------------------------------------------------------------|----|
| KALODDLK_02763 | VCTRVYTTTPKKPNSALRKVCRVRLTNGFEVTSYIGGEGHNLQEHSVILIRGGRVKDLP  | 60 |
| BAE77949.1     | MCTVVKTTTTPKKPNSALRKIARVRLSSAFEVTAYIPGEGHNLQEHSVVLIRGGRVKDLP | 60 |
|                | :** * *****: . ****: . . ****:* ** *****:*****               |    |

|                |                                     |    |
|----------------|-------------------------------------|----|
| KALODDLK_02763 | VRYHTVRGALDCSGVKDRKQARSKYGVKRPKA    | 92 |
| BAE77949.1     | VRYHIVRGSLDTQGVKDRNKSRSKYGTKKPKA    | 92 |
|                | *** **:* * , *****: : *****. * : ** |    |

## (5).C4H:

&gt;KALODDLK\_01569 Putative cytochrome P450 139

GYDIPAESKILVNAWFLANDPKQWVRPDEFRRPERFLGEEKAV-  
KADGNDFRFPFGVGRRSCPGIILALPIIGITLGR>ACE88962.1 cinnamic acid 4-hydroxylase, partial [Phylllostachys edulis]  
GVRLPRGALALYSPYLSGRDPAVWDRPDEFDPGRWAGKPPAWAYLPFGG-  
GERLCLGMHLAQMLIHDALAAL



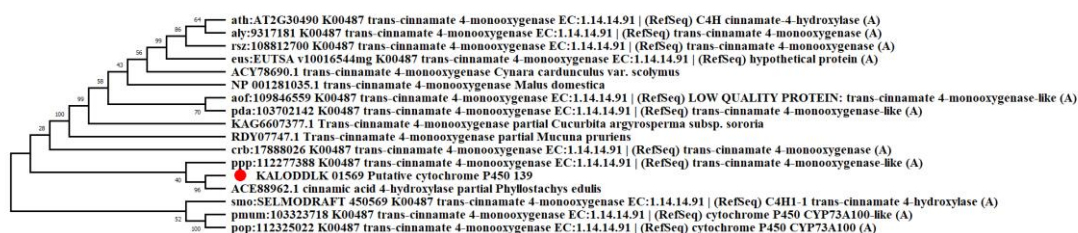

|                |                   |    |
|----------------|-------------------|----|
| KALODDLK_01569 | CPGIILALPIIGITLGR | 78 |
| ACE88962.1     | CLGMHLAQMILHDAAL  | 71 |
|                | * * * * *         |    |

>KALODDLK 01569 Putative cytochrome P450 139

AVMKEVLRRLHPILPLMVPHCPSESCVVGGYTI PKGARVFVNVAIHRDPSI-  
WENPTEFDPERFVDGKG DYSGKDFTYFPFGSGRRICAGIAMAERMVMFSLASL  
> PSS11496.1 Flavonoid 3',5'-hydroxylase [Actinidia chinensis var. chinensis]  
AALKEVLRLYPPGWMGSRRLSRDLIWGGVRLPRGALALYSPYLSGRD-  
PAVWDRPD EDPGRWAGKPPAWAYI PEGGGERI CI GMHL AQMI IHDALAAI

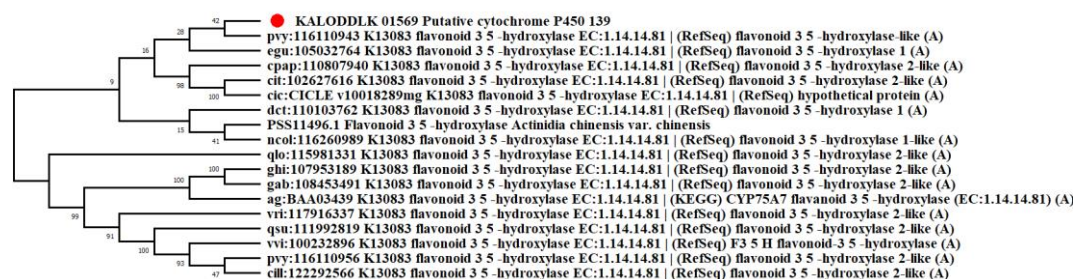

|                |                                             |     |
|----------------|---------------------------------------------|-----|
| KALODDLK_01569 | ERFVDGKGDYSGDKFTYFPFGSGRRICAGIAMERMVMFSLASL | 104 |
| PSS11496.1     | GRWAGKP-----PAWAYLPFGGERLCGLMHLAQLIHDAALAAL | 98  |
|                | *.:..:::*****.*:*:*.:*:.:**:**:             |     |

>KALODDLK 01230 dTDP-glucose 4,6-dehydratase

VLVTGASGFVGSWLVMKLLQAGYTVRATVRDPANVGKTKPLMDLP-  
GATERLSIW-  
KADLAEEGSFHDAIRGCTGVFHVATPMDFLSKDPENEVIKPTVEGMISIMRACKEAGT  
VRRIVFTSSAGTVNLEERQRPVYDEES-  
WTDVDFCRRVKMTGWMYFVSKTLAEKAALAYAAEHGLDLVTIIPTLVVGPFISASMP  
SLITALA

>sp|P51108.1|DFRA\_MAIZE RecName: Full=Dihydroflavonol 4-reductase;  
Short=DFR; AltName: Full=Dihydrokaempferol 4-reductase; AltName: Full=Flavanone 4-  
reductase; Short=FNR

VAVTGAEGFIGSHLVETLVRSGARVRAMVLYNSFGSWGWLDDLPEILEH-  
VEVVLGDVRD-  
PVSVREFMRGAEVVYHLAALIAIPYSYAAPHSYVOTNVVGTNLNVLEAARDLOTPLRV

# HTSTSEVYGTARSVPITERHPLQGGSPYSATKI- AADKLVEAYHLSFGLPVVTLRPFNTYGPRQSARAVIPTIISQIA

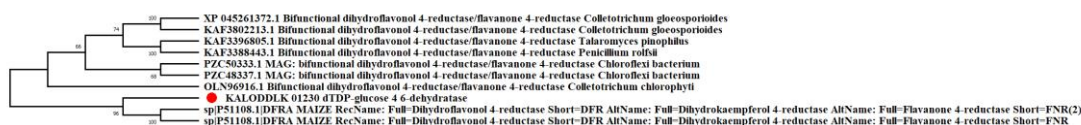

|                        |                                                                   |     |
|------------------------|-------------------------------------------------------------------|-----|
| KALODDLK_01230         | VLVTGASGFVGSWLMKLLQAGYTVRATVRDPANVGKTKPLMDLPG-ATERLSIWKADLA       | 59  |
| sp P51108.1 DFRA_MAIZE | VAVTGAEFGIGSHLVETLVRSGARVRAMVLYNS-FGSWGLDDLPEILEHVEVVLGDVR        | 59  |
|                        | * ***, ***, * * *, * : * : * * * * : , * , * * * * * : : , * , *  |     |
| KALODDLK_01230         | EESGFHDAIRGCTGVFHVATPMDFLSK-DPENEVIKPTVEGMISIMRACKEAGTVRRIVF      | 118 |
| sp P51108.1 DFRA_MAIZE | DPVSVREFMRGAEEVYHLAALIAIPYSYAAPHSYVQTNVVGTLNVLEAARDLQTPRL-VH      | 118 |
|                        | : * , : : : * , * : * : : : : , : : : * , * : : : * , : : * * , * |     |
| KALODDLK_01230         | TSSAGTVNLEERQRPVYDEESWTDVDFCRRVKMTGW-MYFVSKTAEKAAALAYAAEHGLD      | 177 |
| sp P51108.1 DFRA_MAIZE | TSTS-EVYGTARSVPIT-TERHPLQGGSPYSATKIAADKLVEAYHLSFGLP               | 166 |
|                        | * * : : * * , * : , * : * * * , * : * , * * , * * , * * , * * , * |     |
| KALODDLK_01230         | LVTIIPTLVVGPFISAS-MPPSLITALA                                      | 204 |
| sp P51108.1 DFRA_MAIZE | VVTLRPFNTYGPRQSARAVIPTIISQIA                                      | 194 |
|                        | : * * : * , * * * * : * : * : * : *                               |     |

## (8). FLS:

> KALODDLK\_01423 2,3-dihydro-2,3-dihydroxybenzoate dehydrogenase

SSKVWLITGTSSGFGRLVSSVLARGDRVIATSRSLPIQLKGTND-  
NLRLLQLDVTAGEEL-  
LQCKMKEAVSSWGRIDVLVNNAGSCHLGILEEGGSALLRRQYEVNVFGLLDVTNACL  
PHLRAQTEATIVVMGSRSAWTCENMGIGPYGSSKAAVHAVAETLSVEVAPFNIR-  
VLIVEPSAFRTRMVR

> KAF7344498.1 Flavonol synthase [Mycena sanguinolenta]

TARVALVTGAAQGIGAASALAAARGARVLATDRQPIPPDLAAQPGVMPY-  
PLDVTDPRAAEQAVAHAEATLGPLTDLNVNAGVLRPGPLTDLSDDEDWHATFAVNTSG  
VFFVSRAATRVMRARGSGSVTVGSNAAHVPRTGMGAYASSKAAAAHL-  
TRTLGLELAGSGVRCNLVSPGSTDTPMQR

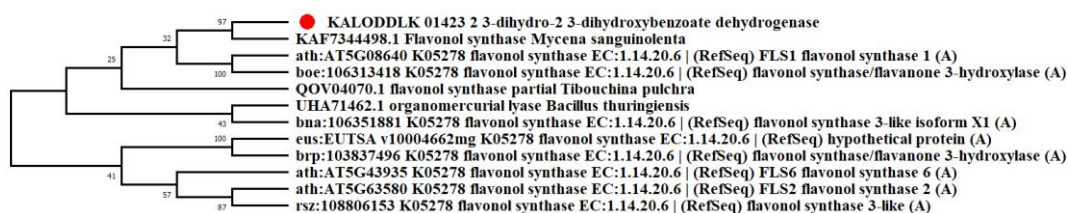

|                |                                                                             |     |
|----------------|-----------------------------------------------------------------------------|-----|
| KALODDLK_01423 | SSKVWLITGTSSGFGRLVSSVLARGDRVIATSRSLPIQLKGTNDNLRLLQLDVTAGE                   | 60  |
| KAF7344498.1   | TARVALVTGAAQGIGAASALAAARGARVLATDRQPIPPDLAA-QPGVMPYPLDVTDP                   | 58  |
|                | : : * * : * : * : * : * : * : * : * : * : * : * : * : * : * : * : * : * : * |     |
| KALODDLK_01423 | ELLQCKMKEAVSSWGRIDVLVNNAGSCHLGILEEGGSALLRRQYEVNVFGLLDVTNACL                 | 120 |
| KAF7344498.1   | AAE-QAVAHAEATLGPLTDLNVNAGVLRPGPLTDLSDDEDWHATFAVNTSGVFFVSRAATR               | 117 |
|                | : , * : : * : * * * * : * * : , : : * , * : : * , *                         |     |
| KALODDLK_01423 | HLRAQTEATIVVMGSRSAWTCENMGIGPYGSSKAAVHAVAETLSVEVAPFNIRVLIVEPS                | 180 |
| KAF7344498.1   | VMRARGSGSVTVGSNAAHVPRTGMGAYASSKAAAAHLTRTLGLELAGSGVRCNLVSPG                  | 176 |
|                | : * : : : : * : * : * , * * * * , : : * , * : * : * : * , *                 |     |
| KALODDLK_01423 | AFRTRMVR                                                                    | 188 |
| KAF7344498.1   | STDTPMQR                                                                    | 184 |
|                | : * * *                                                                     |     |

## (9).ANS:

>KALODDLK\_01230 dTDP-glucose 4,6-dehydratase

KTACVTGGSGYIGSALIKLLEKGYAVKTTVRNPDDMEKNSHLKDLQKLG-  
PLTVFRADMDEEGSFDDAVAGCDYVFLVAAPLHFEAQDPEKEQIEPAIQGTNLNTRMSC  
VKAGTVRRVILTSSVAAYVFRPDLGDBGHGHVLEDESDVDFLRAHKPPT-  
WSHCVSKVLEKEAGRFAEEHGISLVTILPVIVVGAAPAPKARSSIVDCLSMLS  
> BAU68558.1 3-deoxyanthocyanidin synthase [Sorghum bicolor]  
KLVAVTGAEGFIGSHLVETLVRSGARVRAMVLYNSFGSWGWLDDLPPEILEH-  
VEVVLGDVRD-  
PVSVREFMRGAEVVYHLAALIAIPYSYAAPHSYVQTNVVGTLNVLEAARDLQTPRLV  
HTSTSEVYGTARSVPITERHPLQGQSPYSATKI-  
AADKLVEAYHLSFGLPVVTLRPFNTYGPRQSARAVIPTIISQIA

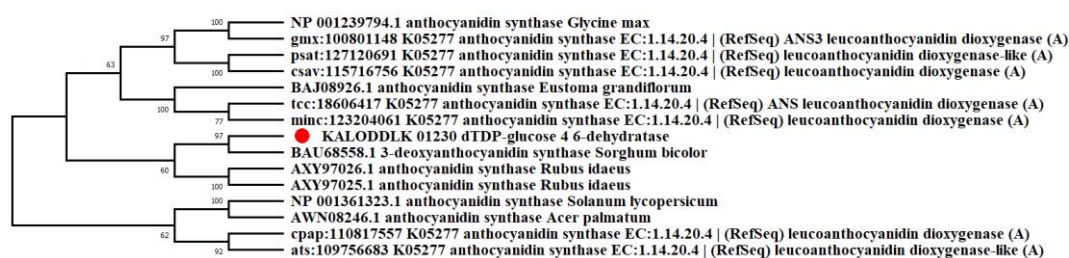

|                |                                                               |     |
|----------------|---------------------------------------------------------------|-----|
| KALODDLK_01230 | KTACVTGGSGYIGSALIKLLEKGYAVKTTVRNPDDMEKNSHLKDLQ—KLGLPLTVFRAD   | 58  |
| BAU68558.1     | KLVAVTGAEGFIGSHLVETLVRSGARVRAMVLYNS—FGSWGWLDDLPPEILEHVEVVLGD  | 59  |
|                | * . . ** . * : *** * : : * . . * : : * . . . * . ** * : * . * |     |
| KALODDLK_01230 | MDEEGSFDDAVAGCDYVFLVA—APLHFEAQDPEKEQIEPAIQGTNLNTRMSCVKAGTV    | 114 |
| BAU68558.1     | VRDPVSVREFMRGAEVVYHLAALIAIPYSYAAPH—SYVQTNVVGTLNVLEAARDLQTP    | 116 |
|                | : : * . : : * . : * : * : * . . : : * : : * : : . * . *       |     |
| KALODDLK_01230 | RRVILTSSVAAYVFRPDLGDBGHGHVLEDESDVDFLRAHKPPTWSHCVSKVLEKEAG     | 174 |
| BAU68558.1     | RLV—HTSTSEVYGTARSVPITERHPL—QGGQSPY—SATKIAADKLVE               | 159 |
|                | * * : * : * : * : * : * : * : * : * : * : * : * : * : * : *   |     |
| KALODDLK_01230 | RFAEEHGISLVTILPVIVVGAAPAPKARSSIVDCLSMLS                       | 213 |
| BAU68558.1     | AYHLSFGLPVVTLRPFNTYGPRQS—ARAVIPTIISQIA                        | 196 |
|                | : . . * : : * : * . * : * : * : * : * : * : * : * : *         |     |

(10).BZ1:

> KALODDLK\_00889 O-mycaminosyltylonolide 6-deoxyallosyltransferase  
QVELFVTHGGLNSTYEGLAAGKPLVVMPPFGDQPVNAQHIVNKGL-  
GAQVDPWTLTAAKLTRAIEAQLADREAA  
> XP\_013906137.1 Anthocyanidin 3-O-glucosyltransferase [Monoraphidium neglec-  
tum]  
RVAAAVHHGGAGTTAAGLAAGVPNVVPPFGDQPFWGDRV-  
QRLGVGPAPVPRRALNERTLADALTRAVTDAGMRDRAAA

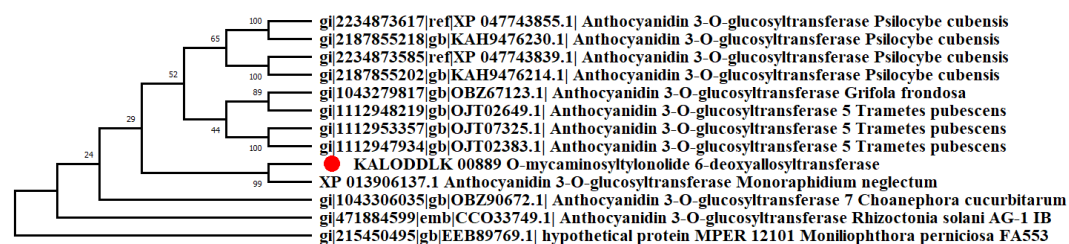

|                |                                                             |    |
|----------------|-------------------------------------------------------------|----|
| KALODDLK_00889 | QVELFVTHGGLNSTYEGLAAGKPLVVMPPFGDQPVNAQHIVNKGLGAQVDPWTLTAAKL | 59 |
| XP_013906137.1 | RVAAAVHHGGAGTTAAGLAAGVPNVVPPFGDQPFWGDRVQRLGVGPAPVPRRALNERTL | 60 |
|                | : * * * * . : * * * * * * : * * * * * . : : . * : * . *     |    |
| KALODDLK_00889 | TRAI—EAQLADREAA                                             | 73 |
| XP_013906137.1 | ADALTRAVTDAGMRDRAAA                                         | 79 |
|                | : * : * : * * *                                             |    |



(11).F3'M:

&gt;KALODDLK\_01569 Putative cytochrome P450 139

AVMKESLRLHPPAPLLVPHCPSEDSLLGGFRVPKGSRVFVNVWAIHRDPT-  
 LWENPTEFDP-  
 DRFVNGGVDYSGNDFSYPFGSGRRMCAGMAMAERMVMYSLTLLHSFNWELPKG  
 EKLDLSEQFGIVLKKKLPLI  
 >XP\_031376784.1 flavonoid 3'-monooxygenase CYP75B137-like [Punica granatum]  
 AALKEVLRLYPPGWMGSRRLSRDLIWGGVRLPRGALALYSPYLSGRD-  
 PAVWDRPDEFDPGRWAGKPPAWAYLPFGGGERLCLGMHLAQMLIHDALAALPPLH  
 AVRGDATPLPGLTLGPRGPI

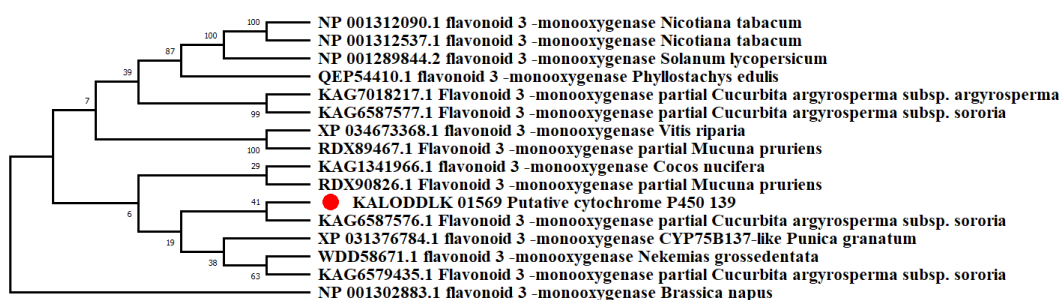

|                |                                                              |     |
|----------------|--------------------------------------------------------------|-----|
| KALODDLK_01569 | AVMKESLRLHPPAPLLVPHCPSEDSLLGGFRVPKGSRVFVNVWAIHRDPTLWENPTEFDP | 60  |
| XP_031376784.1 | AALKEVLRLYPPGWMGSRRLSRDLIWGGVRLPRGALALYSPYLSGRDPAVWDRPDEFDP  | 59  |
|                | *:*:* ***:** : : *:* : ***:** : : : ***:** : ***             |     |
| KALODDLK_01569 | DRFVNGGVDYSGNDFSYPFGSGRRMCAGMAMAERMVMYSLTLLHSFNWELPKGKLDL    | 120 |
| XP_031376784.1 | GRWAGK-----PPAWAYLPFGGGERLCLGMHLAQMLIHDALAALPPLHA---VRG---DA | 108 |
|                | .*:.. :*****.*:* ***:** : : :*:** : : *                      |     |
| KALODDLK_01569 | SEQFGIVLKKKLPLI                                              | 135 |
| XP_031376784.1 | TPLPGLTLGPRGPI                                               | 123 |
|                | : *:. * : ***                                                |     |

(12).R06611(Flavonol 3-O-glucosyltransferase):

&gt;KALODDLK\_00889 O-mycaminosyltylonolide 6-deoxyallosyltransferase

PAEEVVAWLDACPPRSVVYVCFGSQYTPTEKQGRA-  
 LAAALERSGVRFVWAIGGGGAV-  
 VPEGFEGRVVEILNHVAVGAFVTHCGWNSVLEAVAAGVVLLAWPMRADQFANARL  
 VVEELGVAVRVGEGEGTPEPEDLARVMAEAEVAEVAWPEMRVRAAALGRK  
 >XP\_029116545.1 flavonol 3-O-glucosyltransferase UGT89B1-like [Elaeis guineensis]  
 PPPALEAFLNSGPPPVSIGFGSMTTPDPQVTTTRAVVAALARSGQRAVLLSGWG-  
 GLSAADVPTDVFVTDSPHDLFPRVAAAVHHGGAGTTAAGLAAGVPNVVVPFFG  
 DQPFWDGRVQRLGVGPAPVPRRALNERTLADALTRAVTDAGMRDRAAALGAR

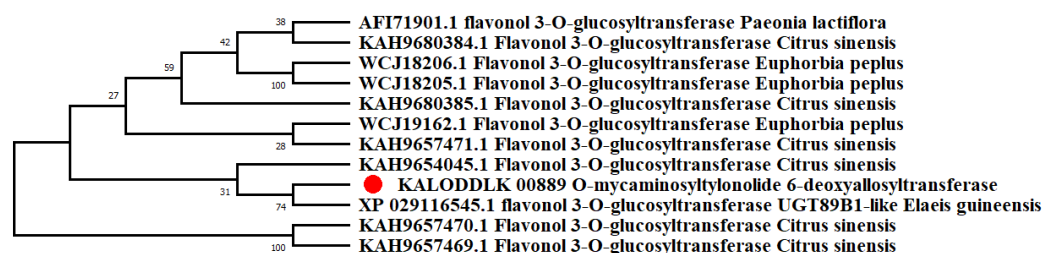



|                |                                                               |     |
|----------------|---------------------------------------------------------------|-----|
| KALODDLK_00889 | PAEVVAWLDACPPRSVVVYVCFGSQYTPTE-KQGRALAAALERSGVRVFWAIGGGGAVVP  | 59  |
| XP_029116545.1 | PPPALEAFLNSGPPP--VSIGFGSMITPDPQVTTTRAVVAALARSGQRAVLLSGWGGLSAA | 58  |
|                | * : *: *: * : * * * * * : * * * * * : * * * * *               |     |
| KALODDLK_00889 | EGFEGRV--EILN----HVAVGAFVTHCGWNSVLEAVAAGVLLAWPMRADQ-FANARLV   | 113 |
| XP_029116545.1 | DVPDVFVTDSPHDLFPRVAAVHHGGAGTTAAGLAAGVNVVPPFGDQPFWGDRV-        | 117 |
|                | : : : * : : . * * * * * : : : * * * : : * : * * * * :         |     |
| KALODDLK_00889 | VEELGVAVRVGEGEGTPEPEDLARVMAEAV-AEVAWPEMRVRAAALGRK             | 162 |
| XP_029116545.1 | -----QRLGVGPAPVPRRALNERTLADALTRAVTDAGMRDRAAALGAR              | 160 |
|                | * : * * . * , * : * : * : * : * * * * * :                     |     |

(13).UGT75C1(Cyanidin 3-O-glucoside 5-O-glucosyltransferase):.

>KALODDLK\_02100 Beta-glucosidase.

DRLDFPKHFIFGASSCAYQVEGAAFEDGRTLSTFDIAAHSGLHPGNG-  
DITSDEYHKYKEDVELMVETGLDAYRFSISWSRLIPNGRGPVNPKGLEYNNLVNALL  
TKGTQPHVTLLHSDLPQALRDEYGGFLFISPKFIDDFVAYADVCFREFGDRVLRHWTT-  
FNE-  
ANFLAFGDENTPASALYLSAHHLLLAHASATRLYRENYQASQRGFIGINVYAYDFIPET  
NTEVDVIAAKRARDFFIGWFVQPLMNGEYPLTMRKNGGPRLPKFTPNETELLTGSYD-  
FIGL-  
NYYTAKTVKDDPVMLTVEPRNYYTDQGLISSYLGNIIDPYQGHPPFNTPWGLHDVLQQ  
FKQVYGNPPVYIHENGEVGDHDADYDKLINDIPRVEYLQGHIRAVLDA-  
VRNGSNVKGyFVWSFLDMYELMYGTFKFTFGLYIDFNDPKLTRHPKLSQKWYSRFL.  
>sp|E3W9M2.1|AA5GT\_DIACA RecName: Full=Cyanidin 3-O-glucoside 5-O-glucosyltransferase (acyl-glucose).  
DPAFFPARFTWGVATSSYQIEGAPREDGKGPSIWDTFCRTPGKVRGGDTGDVAC-  
DH-  
YHRLSDLDLMIRDLGVNAYRFSISWPRILPHGRGAVNQAGLDFYQRLVDGLLTRGITP  
WATLYHWDLPQTLEDEGGWTVRGTAFAFGTYSAVVAAALGDRVKHFITLNEP-  
WCSAYLGYGI-  
GIHAPGRHDLRASFAATHLLVGHGRAMQAIRGQAPGAQAGITLNLHHTYPATDTP  
ADRAAAYRMDGFQNRWYLDVPYVGRGYPDQDMVDLLGDL-  
SPQAQGLVLPDTELMGQPTD-  
FLGVNMYRAVGQDAPGEGFLHARQIRPEGSAYTGFDWEVAPDSLTDLLVRLQEDYA  
PDAIYITENGSTYPDVADEDGNVNDLERTQYLTEHLAATQEALARGAKVAGY-  
FAWSLMDNFEWAEGYDKRFGIVHVDFTQVRTPKLSGRTRYRDL.

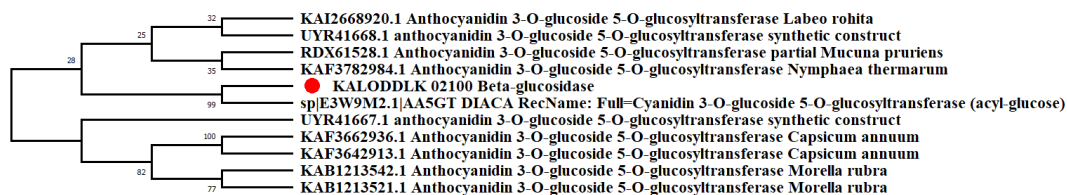

[illegible]

DRLLDFPKHFIFFGASSCAYQVEGAAFEDGRTLSTFDIAAHSGLHPGNG-  
DITSDEYHKYKEDVELMVETGLDAYRFSISWSRLIPNGRGPVNPKGLEYNNLNVNALL  
TKGTQPHVTLLHSDLPQALRDEYGGFLFISPKFIDDFVAYADVCREFGDRVLHWTT-  
FNE-  
ANFLAFGDENTPASALYLSAHHLLLAHASATRLYRENYQASQRGFIGINVYAYDFIPET  
NTEVDVIAAKRARDFFIGWVQPLMNGEYPLTMRKNGGPRLPKFTPNETELLTGSYD-  
FIGL-  
NYYTAKTVKDDPVMLTVEPRNYYTDQGLISSYLGNIIDPYQGHPFFNTPWGLHDVLQQ  
FKQVYGNPPVYIHENGEVGDHDADYDKLINDIPRVEYLQGHIRAVLDA-  
VRNGSNVKG YFVWSFLDMYELMYGKTFGLYIDFNDPKLTRHPKLSQKWYSRFL  
    >sp|E3W9M2.1|AA5GT\_DIACA RecName: Full=Cyanidin 3-O-glucoside 5-O-glu-  
cosyltransferase (acyl-glucose)  
    DPA RF PARFTWGVATSSYQIEGAPREDGKGPSIWDTFCRTPGKVRGGDTGDVAC-  
DH-  
YHRLDSLDLMIRDLGVNAYRFSISWPRILPHGRGAVNQAGLDFYQRLVDGLLTRGITP  
WATLYHWDLPQTLEDEGGWTVRGTA EAFGTYS AVVAAALGDRVKH FITLNEP-  
WCSAYLGYGI-  
GIHAPGRHDLRASFAATHHLLVGHGRAMQAIRGQAPGAQAGITLNLHHTYPATDTP  
ADRAAAYRMDGFGQNRWYLDPVYGRGYPQDMVDLLGDL-  
SPQAQGLVLPGDTELMGQPTD-  
FLGVNMYSRAVGQDAPGEGFLHARQIRPEGSAYTGFDWEVAPDSLTDLLVRLQEDYA  
PDAIYITENGSTYPDVADEDGNVNDLERTQYLTEHLAATQEALARGAKVAGY-  
FAWSLMDNFEWAEGYDKRFGIVHVDFTOVRTPKLSGRTRYRDFL

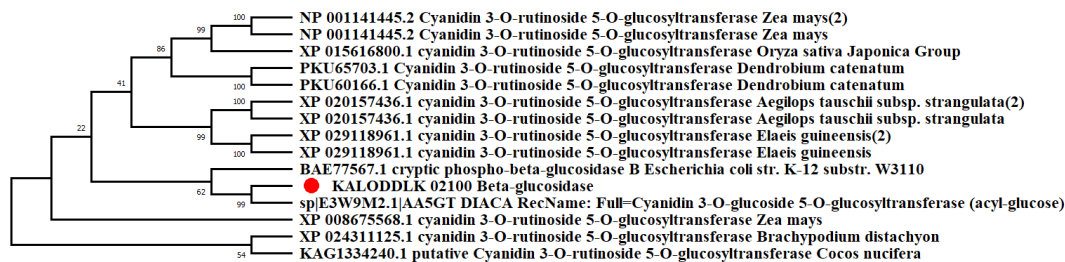

|                         |                                                                                  |     |
|-------------------------|----------------------------------------------------------------------------------|-----|
| KALODDLK_02100          | DRLDFPKHFIHGASSAYQVEGAFFEDGRTLSTFDIAHS—GHL—PGNGDITSDEYHKY                        | 57  |
| sp E3W9M2.1 AA5GT_DIACA | DPARFPARFTWGVATSSYQIEGAPREDGKGPSIWDTCRTPGKVRGGDTGDVACDHYHRL                      | 60  |
|                         | * ** : * : * : * : * : * : * : * : * : * : * : * : * : * : * : * : * : * : * : * |     |
| KALODDLK_02100          | KEDVELMVETGLDAYRFSISWSRLIPNGRGPVNPGLLEYNNLVNALLTKGTQPHVTLH                       | 117 |
| sp E3W9M2.1 AA5GT_DIACA | DSLDLMIRD LGVNYRFSISWPRILPHGRGAVNQAGLDFYQRLVDGLLTRGITPWATLYH                     | 120 |
|                         | ..*::: : * : * : * : * : * : * : * : * : * : * : * : * : * : * : * : * : * : *   |     |
| KALODDLK_02100          | SDLPQALRDEYGGFLISPKFIDDFVAYADVCFREFGDRVLHWTTFNEANFLA—FGDE—                       | 173 |
| sp E3W9M2.1 AA5GT_DIACA | WDLPTILEDEGGWT—VRGTAEAFGTYSAVVAALGDRVKHFITLNEPWCAYLGYGIGI                        | 178 |
|                         | ***: * : * : * : * : * : * : * : * : * : * : * : * : * : * : * : * : * : *       |     |
| KALODDLK_02100          | —NTPASALYLSAHHLLLAHASATRLYRENYQASQRFIGINVYDFIPETNTEVDV                           | 229 |
| sp E3W9M2.1 AA5GT_DIACA | HAPGRHDLRASFAATHLLVGHGRAMQAIRGQAPGAQA—GITLNLHHTYPATDTPADR                        | 235 |
|                         | . * : : * : * : * : * : * : * : * : * : * : * : * : * : * : * : * : * : *        |     |
| KALODDLK_02100          | IAAKRARDFFIGWVQPLMNGEYPLTMRKNGGPRLP—KFTPNTELLTGSYDFIGLN                          | 285 |
| sp E3W9M2.1 AA5GT_DIACA | AAAYRMDGFQNRWYLDPVYGRGYPQDMVDLLGDLSPQAQGLVLPGLTLMGQPTDFLGYN                      | 295 |
|                         | ** * : * : * : * : * : * : * : * : * : * : * : * : * : * : * : * : * : * : *     |     |
| KALODDLK_02100          | YTTAKTVKDDPVMLTVEPRNYTDQGLISSVLGNIDPYQGHFFNTPWGLHDVLQQFKQV                       | 345 |
| sp E3W9M2.1 AA5GT_DIACA | MYSRAVGQDAPCEGFLHARQIR—PEGSAYTGDFWEVAPDSLTLVRLQED                                | 345 |
|                         | * : . * : * : . : * : . : * : * : . : * : * : * : * : * : * : * : * : * : *      |     |
| KALODDLK_02100          | YGNPPVYIHENGVEGDHDADYDKLINDIPRVEYLQGHIRAVLDVNRGNSNVKGYFVWSFL                     | 405 |
| sp E3W9M2.1 AA5GT_DIACA | YAPDAIYITENGSTYPDAEDGNVNDLERTQYLTEHLAATQEALARGAKVAGYFAWSLM                       | 405 |
|                         | * : * : * : * : . * : * : * : * : * : * : * : * : * : * : * : * : * : * : *      |     |
| KALODDLK_02100          | DMYELMYGKFTFGLYYIDFNDPKLTRHPKLSQKWYSRFL                                          | 445 |
| sp E3W9M2.1 AA5GT_DIACA | DNFEWAEGYDKRFGIVHVDFTQ—VRTPKLSGRTYRDFL                                           | 443 |
|                         | * : * : * : . * : * : * : * : * : * : * : * : * : * : * : * : * : * : * : *      |     |

### HPLC results

In Figure S2c, Eluting peaks of calibrator were observed at 4.4min, 5.9min and 6.2min, represent quercetin, kaempferol and isopurine respectively. The production of flavonoid during fermentation is determined by its peak area (mAU) and its properties can be determined by the time of peaking. **Figure S2a** shows the content of each substance in the blank medium, three flavonoids were not detected. **Figure S2b** represents bacterial fermentation broth, quercetin was identified.

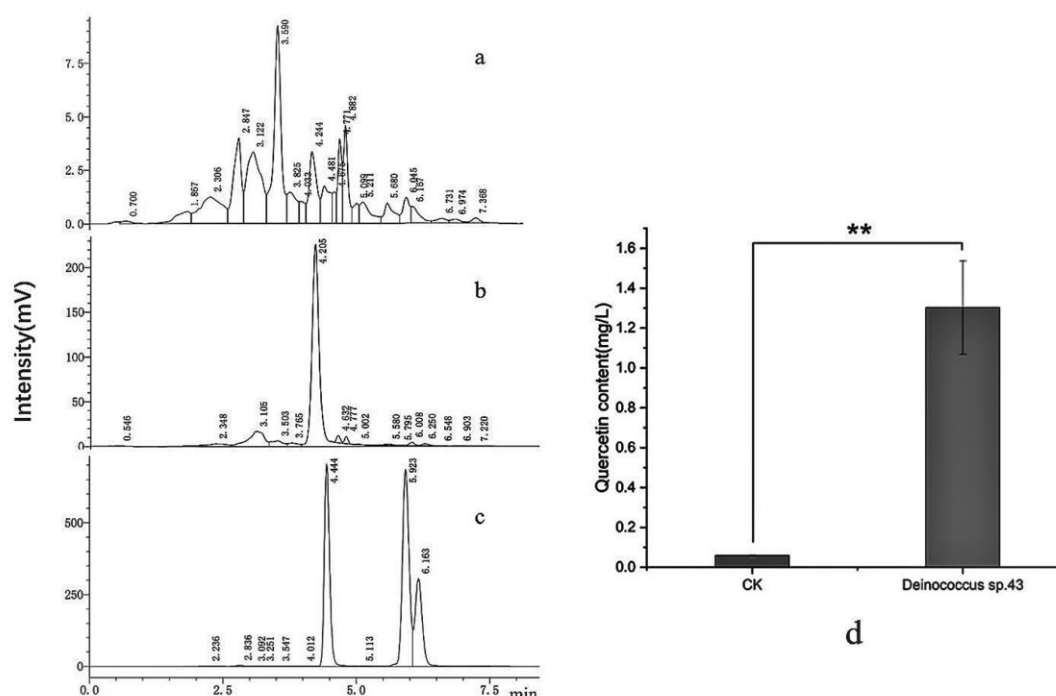

**Figure S2.** In FS2(c), Eluting peaks of calibrator were observed at 4.4min, 5.9min and 6.2min, represent quercetin, kaempferol and isopurine respectively. The production of flavonoid during fermentation is determined by its peak area (mAU) and its properties can be determined by the time of peaking. FS2(a) shows the content of each substance in the blank medium, three flavonoids were not detected. FS2(b) represents bacterial fermentation broth, quercetin was identified.

### LC-MS detection quality control.

The repeatability of metabolite extraction and instrument detection can be judged by analyzing the overlap of mass spectrometry total ion chromatograms (TIC diagram) of three QC samples. **Figure S3** shown the TIC of three QC samples in positive ion and negative ion modes, which reflected the reliability of sample preparation process and LC-MS detection.

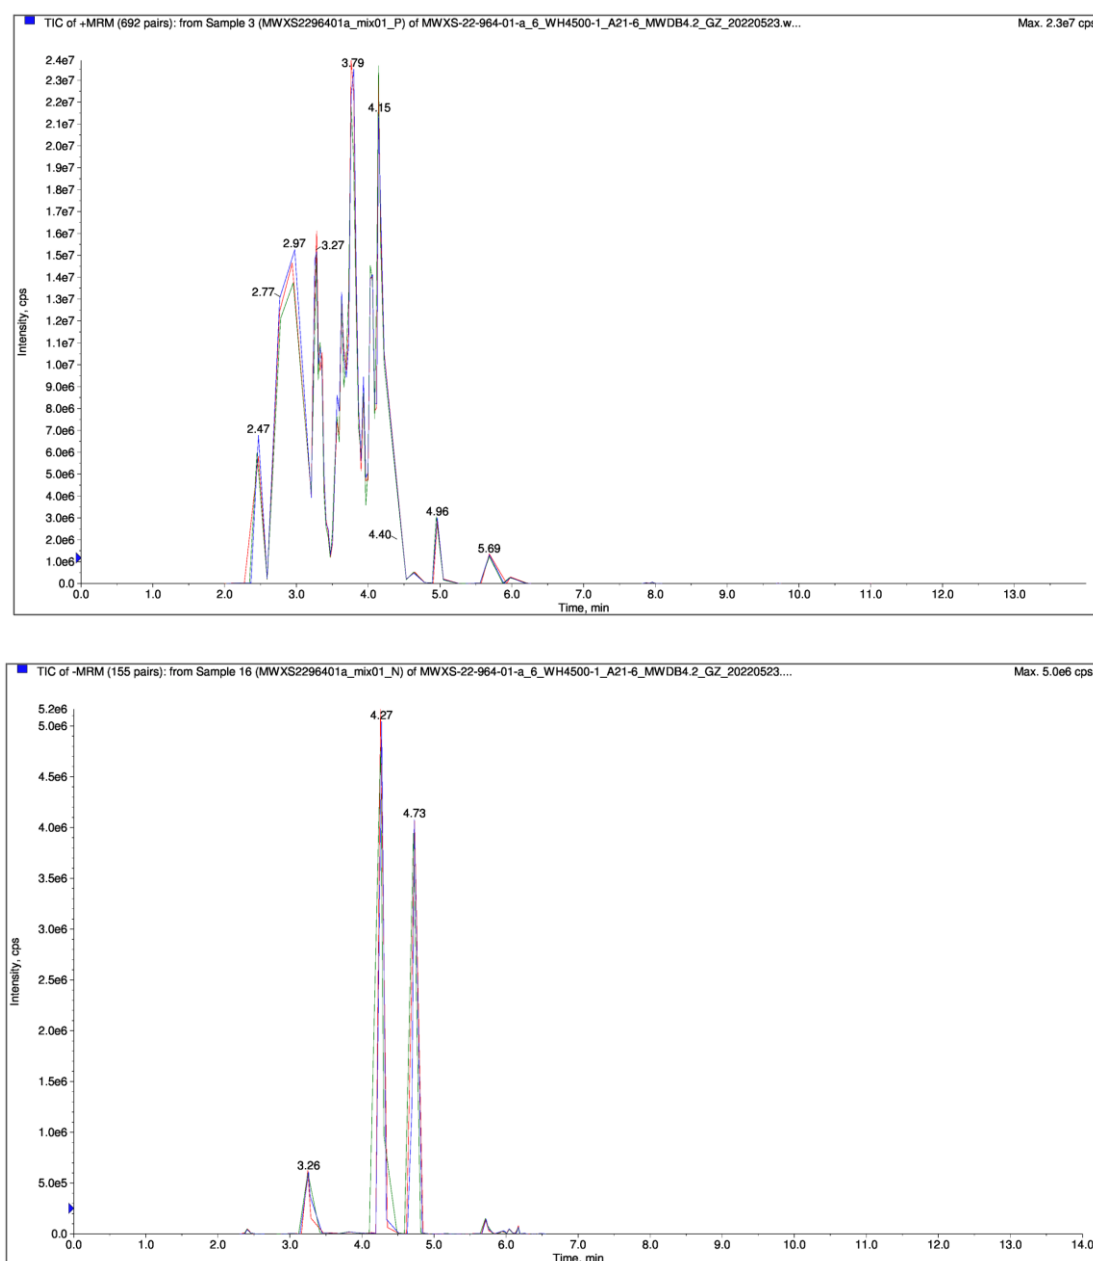

**Figure S3.** The repeatability of metabolite extraction and instrument detection can be judged by analyzing the overlap of mass spectrometry total ion chromatograms (TIC diagram) of three QC samples. FS3 shown the TIC of three QC samples in positive ion and negative ion modes, which reflected the reliability of sample preparation process and LC-MS detection.

Based on metabolite database analysis, we performed qualitative analysis of all detected ion types. In the multi-peak diagram of MRM metabolite detection in multi reaction monitoring mode, the samples that can be detected in positive ion and negative ion modes are displayed, and the peaks of different colors represent different metabolites (**Figure S4**). After filtering the blank control signal, there were relatively many kinds of



metabolites in the sample, and the number of peaks with strong signal was moderate, which was an ideal microbial experimental model.

positive ion modes

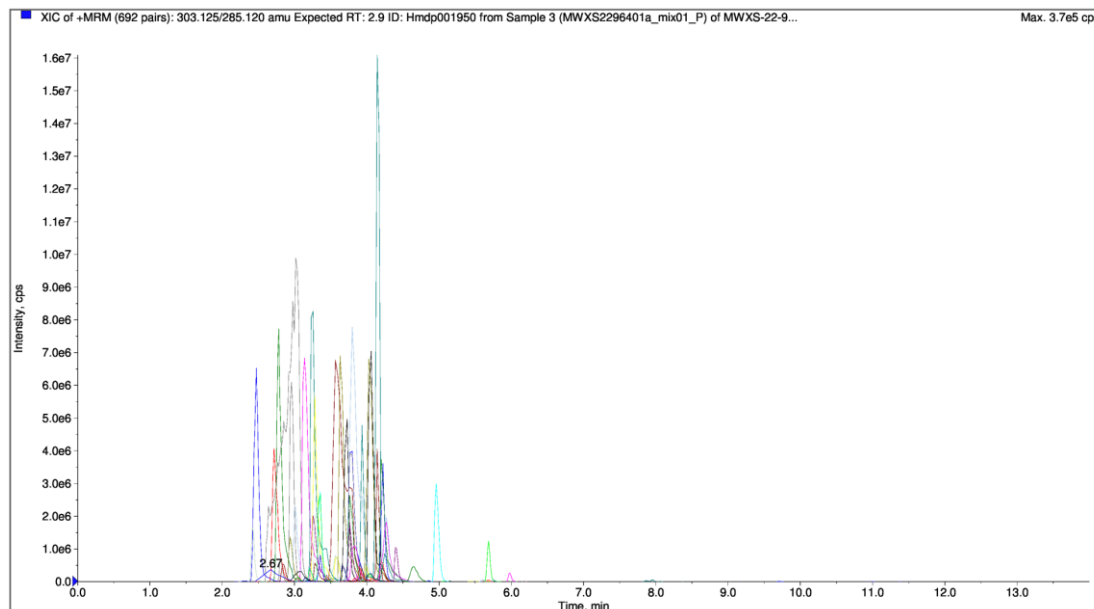

negative ion modes

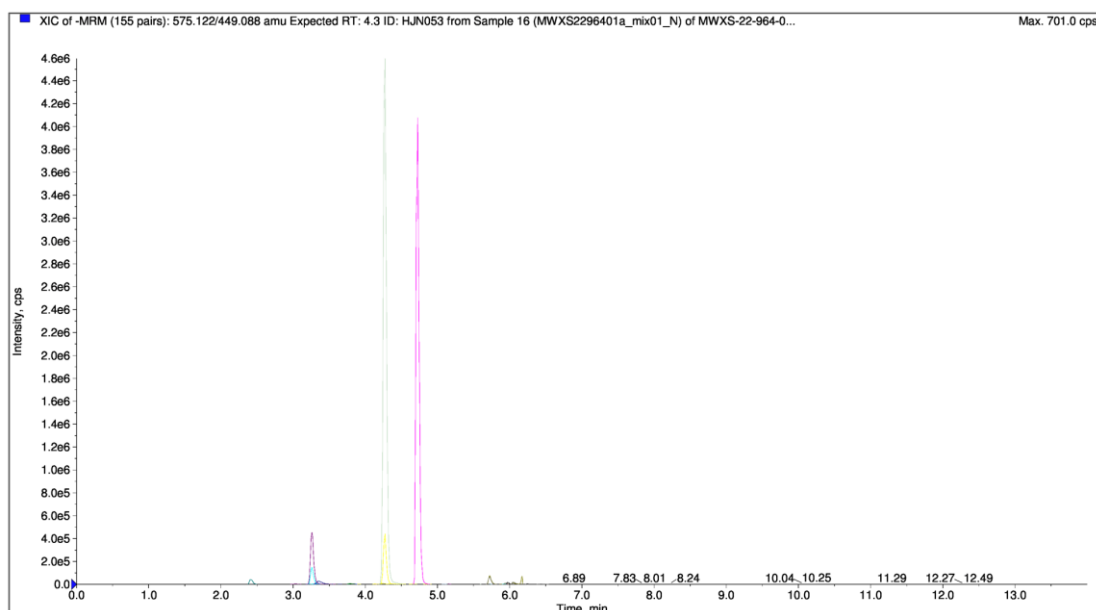

**Figure S4.** Based on metabolite database analysis, we performed qualitative analysis of all detected ion types. In the multi-peak diagram of MRM metabolite detection in multi reaction monitoring mode, the samples that can be detected in positive ion and negative ion modes are displayed, and the peaks of different colors represent different metabolites (FS4). After filtering the blank control signal, there were relatively many kinds of metabolites in the sample, and the number of peaks with strong signal was moderate, which was an ideal microbial experimental model.
